# Supplementary material for: Neuroprotective Potential of Mesenchymal Stem Cell-Based Therapy in Acute Stages of TNBS-Induced Colitis in Guinea-Pigs
Source: PLoS One. 2015 Sep 23;10(9):e0139023. doi: 10.1371/journal.pone.0139023 (PMC4580595; doi:10.1371/journal.pone.0139023)
Supplement: S1 Dataset — Guinea-pigs were weighed daily from day of treatment until up to 72 hours after treatment. Raw data of weight (g) at 24, 48 and 72 hours was calculated as a percentage of weight at day 0 (Sheet 1). These values were used to create Table 2 and Fig 2 (Sheet 2). (XLSX) [file pone.0139023.s001.xlsx]

## Sheet: Data
S1 Dataset. Body weight of Guinea pigs within 72 hours post induction of colitis or sham treatments
	Time
Sham	6hr	24hr	48hr	72hr
	100.583	104.771	105.999	107.016
	100.967	100.238	106.992	107.154
	100.893	102.987	104.724	106.189
	101.32	101.724	103	108.411
Mean	100.941	102.43	105.179	107.192
SD	0.3028	1.92298	1.72365	0.917092
SEM	0.1514	0.961492	0.861827	0.458546
TNBS	6hr	24hr	48hr	72hr
	100.1	95.9869	101.53	102.8
	100.034	98.0586	97.5928	97.0008
	100.126	96.1753	98.8593	98.1002
	100.733	91.2903	93.6803	91.05
Mean	100.248	95.3778	97.9157	97.2378
SD	0.325268	2.88107	3.26596	4.83156
SEM	0.162634	1.44053	1.63298	2.41578
MSC	6hr	24hr	48hr	72hr
	100.225	101.01	103.46	105.028
	101.247	104.614	107.45	110.146
	100.008	104.551	106.05	107.237
	99.7129	100.812	101.2	102.901
Mean	100.298	102.747	104.54	106.328
SD	0.666635	2.12161	2.7731	3.10034
SEM	0.333317	1.06081	1.38655	1.55017
CM	6hr	24hr	48hr	72hr
	100	101.507	104.201	111.285
	100.336	100.164	104.376	106.127
	99.8169	100.897	100.08	107.837
	99.9931	100.915	103.686	104.861
Mean	100.037	100.87	103.086	107.527
SD	0.217062	0.549789	2.02526	2.78594
SEM	0.108531	0.274894	1.01263	1.39297
UCM	6hr	24hr	48hr	72hr
	100.339	100.475	100.153	99.1477
	100	98.981	98.467	100.962
	99.9652	98.4862	103.311	105.46
	99.6341	97.12	95.098	95.4
Mean	99.9847	98.7657	99.2573	100.242
SD	0.288317	1.38515	3.42355	4.1788
SEM	0.144158	0.692573	1.71177	2.0894
