# Supplementary material for: Neuroprotective Potential of Mesenchymal Stem Cell-Based Therapy in Acute Stages of TNBS-Induced Colitis in Guinea-Pigs
Source: PLoS One. 2015 Sep 23;10(9):e0139023. doi: 10.1371/journal.pone.0139023 (PMC4580595; doi:10.1371/journal.pone.0139023)
Supplement: S5 Dataset — Nerve fibers in cross sections of the distal colon were labelled by neuron specific anti-β-tubulin (III) antibody. Image J was used to assess the density of fibers in all groups at all time points and presented as a percent area of β-tubulin (III)-IR. (XLSX) [file pone.0139023.s005.xlsx]

## Sheet: Sheet1
S5 Dataset. Cross sections Tubulin
	TNBS		TNBs+UCM		TNBS+MSC		TNBS+CM		SHAM
6h	6.548	1	6.6598	1	7.9853	1	7.9853	1	10.482	1
24h	6.2548	1	6.4789	1	9.6548	1	9.6254	1	10.659	1
72h	6.7951	1	6.3258	1	9.6254	1	9.6582	1	10.3698	1
	Sham			TNBS			MSC			CM			UCM
	Mean	SEM	N	Mean	SEM	N	Mean	SEM	N	Mean	SEM	N	Mean	SEM	N
6h	10.482	1.369	4	6.548	1.3265	4	7.9	1.2486	4	7.9853	1.3658	4	6.6598	1.3658	4
24h	10.659	1.254	4	6.2548	1.359	4	9.6548	1.358	4	9.6254	1.3659	4	6.4789	1.258	4
72h	10.3698	1.369	4	6.7951	1.3658	4	9.6254	1.3659	4	9.6582	1.369	4	6.3258	1.483	4
