# Supplementary material for: Neuroprotective Potential of Mesenchymal Stem Cell-Based Therapy in Acute Stages of TNBS-Induced Colitis in Guinea-Pigs
Source: PLoS One. 2015 Sep 23;10(9):e0139023. doi: 10.1371/journal.pone.0139023 (PMC4580595; doi:10.1371/journal.pone.0139023)
Supplement: S8 Dataset — The total number of ChAT-IR neurons was counted in 8 images from each animal per group per time point. The sum of ChAT-IR neurons counted in LMMPs from each animal was averaged per group and time point and presented as a mean. The proportion of ChAT-IR neurons to the total number of neurons was calculated by dividing the mean sum of ChAT-IR neurons per group per time point with the total number of neurons x 100. (XLSX) [file pone.0139023.s008.xlsx]

## Sheet: ChAT
S8 Dataset. Wholemounts ChAT
60X
6hr
SHAM	151	TNBS+MSC	153	TNBS+UCM	144	TNBS	153	TNBS+CM	148
	160		149		146		149		158
	158		159		142		156		158
	154		146		151		164		155
	155.75		151.75		145.75		155.5		153
	4.03113		5.61991		3.86221		6.35085		4.71699
	2.01556		2.80995		1.93111		3.17543		2.3585
24hr
SHAM	147	TNBS+MSC	158	TNBS+UCM	110	TNBS	107	TNBS+CM	144
	168		152		112		108		149
	172		151		119		102		157
	145		157		118		113		151
	158		154.5		114.75		107.5		146.5
	13.9762		3.51188		4.42531		4.50925		5.37742
	6.98809		1.75594		2.21265		2.25462		2.68871
72hr
SHAM	154	TNBS+MSC	148	TNBS+UCM	116	TNBS	96	TNBS+CM	142
	155		143		116		116		157
	150		160		110		115		148
	160		149		119		118		159
	154.75		150		115.25		111.25		149.5
	4.11299		7.16473		3.77492		10.2429		7.93725
	2.05649		3.58236		1.88746		5.12144		3.96863

## Sheet: Proportion ChAT-Hu
6hr	SHAM	TNBS	TNBS+MSC	TNBS+CM	TNBS+UCM	Proportion
ChAT	156.333	156.333	151.5	152.5	145.8	Mean	SHAM	TNBS	TNBS+MSC	TNBS+CM	TNBS+UCM
Hu	264	259.75	263.5	263.5	261.5	6h	59.2172	60.1861	57.4953	57.8748	55.7553
Proportion	59.2172	60.1861	57.4953	57.8748	55.7553	24h	60.7692	52.6829	59.769	57.7036	54.9582
24hr	SHAM	TNBS	TNBS+MSC	TNBS+CM	TNBS+UCM	72h	59.2593	55.1673	58.0769	58.8583	53.9458
ChAT	158	108	155.25	147	115	SEM	SHAM	TNBS	TNBS+MSC	TNBS+CM	TNBS+UCM
Hu	260	205	259.75	254.75	209.25	6h	2.72845	4.6667	2.63	2.7	2.46
Proportion	60.7692	52.6829	59.769	57.7036	54.9582	24h	7.02377	2.3	2.05	2.98	1.633
72hr	SHAM	TNBS	TNBS+MSC	TNBS+CM	TNBS+UCM	72h	2.4037	5.2	4.43	3.5	11.615
ChAT	154.667	111.3	151	149.5	114.5
Hu	261	201.75	260	254	212.25
Proportion	59.2593	55.1673	58.0769	58.8583	53.9458
